# Supplementary material
Source: PubMed Central journal article supplement (PMC8570296)
Supplement: NIHMS1701768-supplement-Supplement.pdf [file NIHMS1701768-supplement-Supplement.pdf]

**Developmental Cell, Volume 56**

**Supplemental information**

**Toll receptors remodel epithelia by directing  
planar-polarized Src and PI3K activity**

**Masako Tamada, Jay Shi, Kia S. Bourdot, Sara Supriyatno, Karl H. Palmquist, Omar L. Gutierrez-Ruiz, and Jennifer A. Zallen**

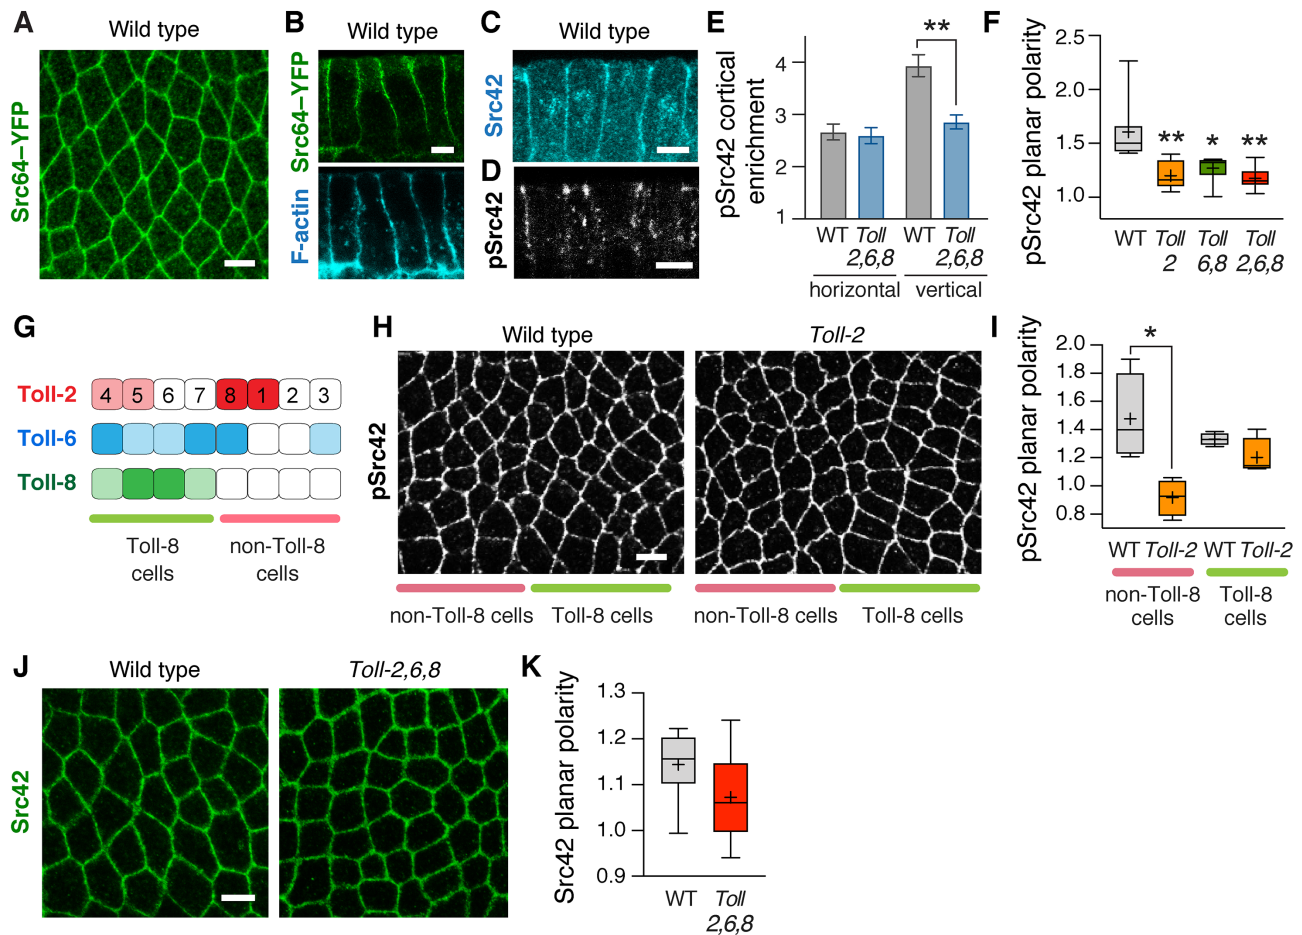

**Figure S1. Src localization in wild-type embryos and Toll receptor mutants. Related to Figure 1.** (A) Src64-YFP localization. (B-D) Cross sections of Src64-YFP and F-actin (B), total Src42 (C), and phosphorylated Src42 (pSrc42) (D). (E) pSrc42 enrichment at horizontal (0-15°) and vertical (75-90°) edges normalized to the mean image intensity. Mean±SEM. Angular ranges are relative to the anterior-posterior (AP) axis. (F) pSrc42 planar polarity (vertical-to-horizontal edge intensity ratio) is reduced in *Toll-2* single mutants, *Toll-6,8* double mutants, and *Toll-2,6,8* triple mutants. (G) *Drosophila* Toll receptors are expressed in striped patterns along the anterior-posterior (AP) axis that repeat every two compartments (parasegments). Cells 1-4, even compartments. Cells 5-8, odd compartments. (H) pSrc42 localization in wild type and *Toll-2* mutant embryos. (I) pSrc42 planar polarity is significantly reduced in *Toll-2* mutant cells that do not express Toll-8 (non-Toll-8 cells). (J,K) Total Src42 localization is not significantly altered in *Toll-2,6,8* mutants. Boxes, 2nd and 3rd quartiles; whiskers, min to max; horizontal line, median; +, mean, 3-5 fixed stage 7 embryos/genotype, \*\* $p < 0.005$ , \* $p \leq 0.03$ , Welch's t-test. Anterior left, ventral down (A, H, and J). Cross sections, apical up (B-D). Bars, 5  $\mu$ m.

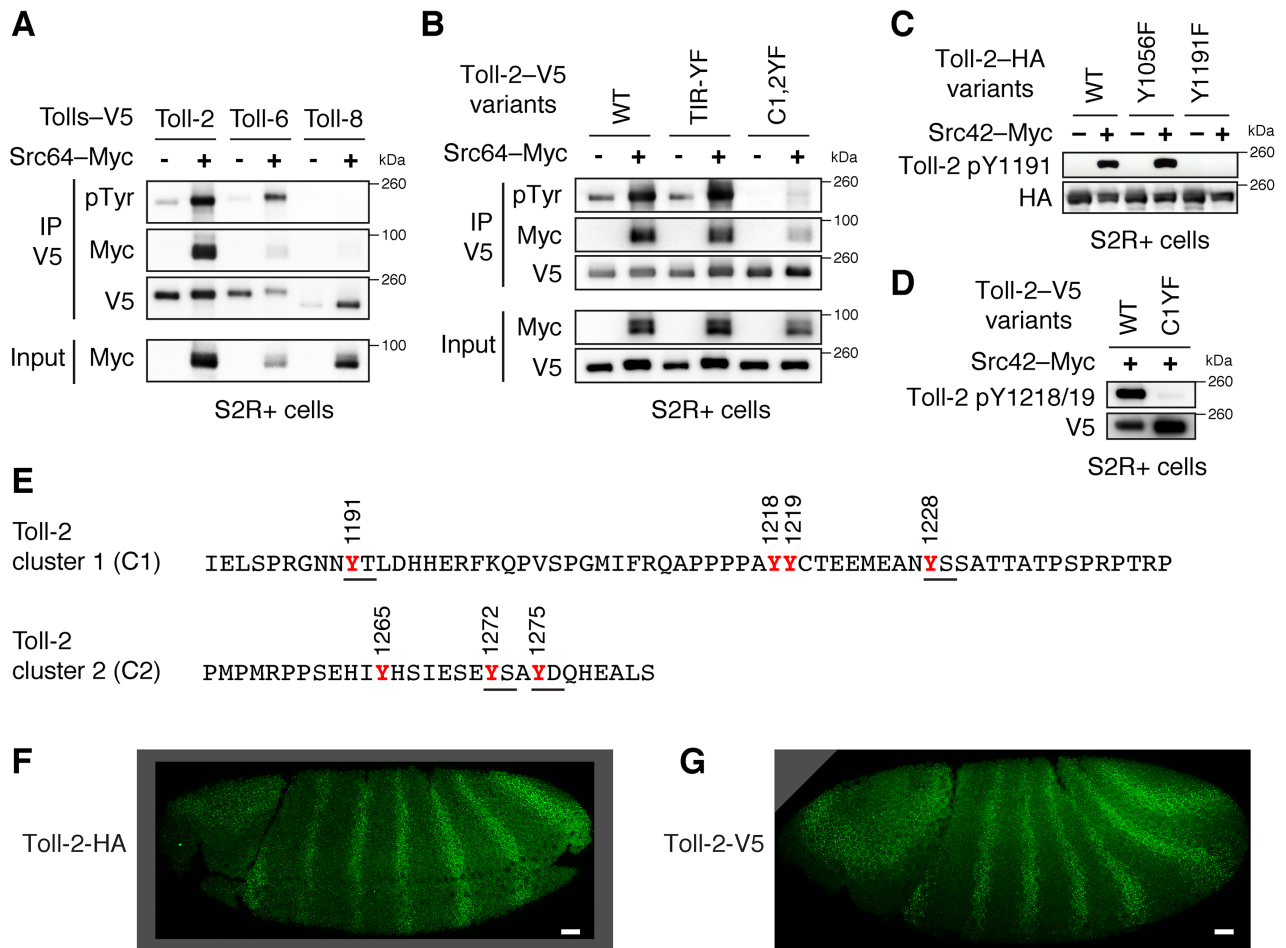

**Figure S2. Toll-2 tyrosine phosphorylation is enhanced by Src42 and Src64. Related to Figure 1.** (A) Src64 promotes the tyrosine phosphorylation of Toll-2 and Toll-6, but not Toll-8, in *Drosophila* S2R<sup>+</sup> cells. Src64 associates strongly with Toll-2 and weakly with Toll-6. (B) Src64 associates with and promotes the tyrosine phosphorylation of wild-type Toll-2 (WT) and Toll-2<sup>TIR-YF</sup> but not Toll-2<sup>C1,2YF</sup> in S2R<sup>+</sup> cells. (C) Src42 promotes the phosphorylation of Toll-2-HA in S2R<sup>+</sup> cells, detected with a phosphospecific antibody to Toll-2 Y1191. No signal is detected in cells expressing Toll-2<sup>Y1191F</sup>, confirming antibody specificity. (D) Src42 promotes the phosphorylation of Toll-2-V5 in S2R<sup>+</sup> cells, detected with a phosphospecific antibody to Toll-2 Y1218/Y1219. No signal is detected in cells expressing Toll-2<sup>C1YF</sup>, confirming antibody specificity. Toll-2 variants were immunoprecipitated (IP) from S2R<sup>+</sup> cells. (E) Sequences of Toll-2 tyrosine clusters C1 and C2. Predicted Src consensus sites are underlined (based on c-Src motifs in Schwartz and Gygi, 2005). (F,G) Toll-2-HA (F) and Toll-2-V5 (G) are expressed in the wild-type striped pattern in fixed stage 7 embryos. Anterior left, ventral down. Bars, 20  $\mu$ m.

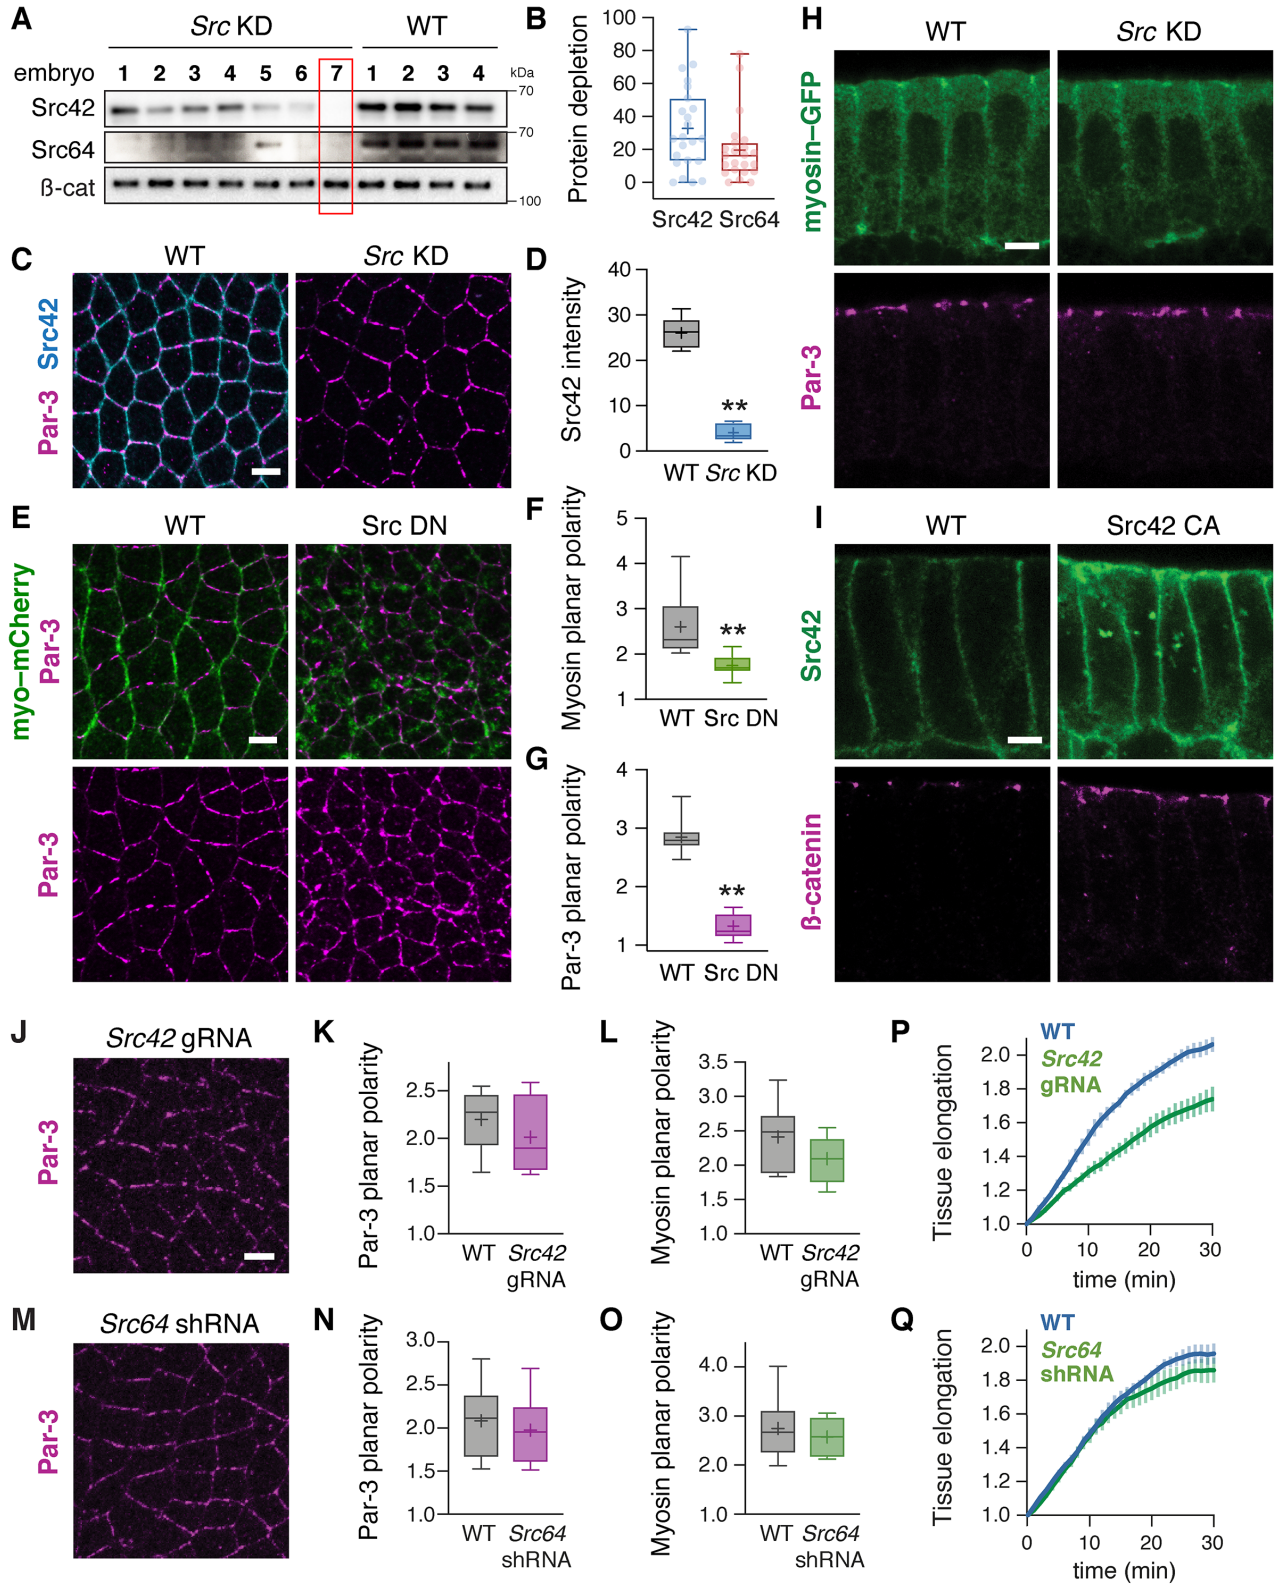

**Figure S3. Src kinases regulate planar polarity, but not apical-basal polarity, in the *Drosophila* embryo. Related to Figure 2.** (A) Western blot of wild-type (WT) and *Src* KD embryos recovered after time-lapse imaging (1 embryo/lane). Embryo 7 was selected for further analysis. (B) Src42 and Src64 levels in single-embryo western blots of *Src* KD embryos. Protein levels are shown as a percentage of the mean WT value (23 *Src* KD and 11 WT embryos). (C,D) Total Src42 (shown in both panels in C) is strongly reduced at the membrane in *Src* KD embryos. The ratio of the mean intensity of all edges to the mean image intensity is shown in D. (E-G) Myosin–mCherry (green) and Par-3 (magenta) planar polarity are disrupted in *Src* DN embryos. (H,I) Apical-basal polarity occurs normally in *Src* KD (H) and Src42 CA (I) embryos. (J-O) Par-3 and myosin–GFP planar polarity were not significantly affected in embryos expressing a maternal gRNA targeting *Src42* (J-L) or a maternal shRNA targeting *Src64* (M-O) ( $p > 0.2$ , Welch's t-test). (P,Q) Axis elongation (tissue AP length relative to  $t=0$  min) in WT vs. *Src42* gRNA embryos ( $p < 0.009$  at  $t=30$  min) (P) and in WT vs. *Src64* shRNA embryos ( $p=0.3$  at  $t=30$  min) (Q). Mean $\pm$ SEM in (P and Q). Boxes, 2nd and 3rd quartiles; whiskers, min to max; horizontal line, median; +, mean, 3-7 fixed stage 7 embryos/genotype in (C-O) and 3-4 living stage 7-8 embryos/genotype in (P and Q), \*\* $p < 0.009$ , Welch's t-test. Anterior left, ventral down (C, E, J, and M). Cross sections, apical up (H and I). Bars, 5  $\mu$ m.

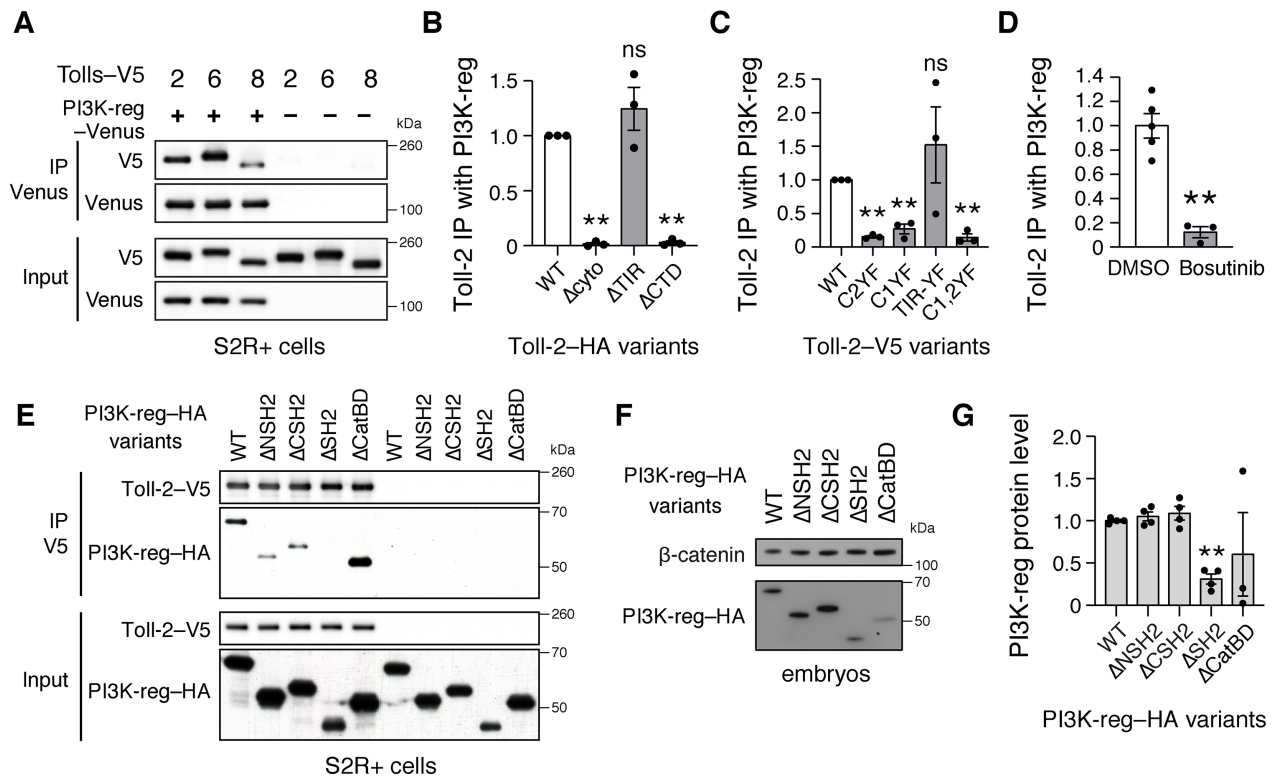

**Figure S4. Biochemical analysis of the association between Toll-2 and PI3K-reg. Related to Figure 3.** (A) Immunoprecipitation (IP) of PI3K-reg-Venus pulled down Toll-2, Toll-6, and Toll-8 C-terminally tagged with V5 in *Drosophila* S2R<sup>+</sup> cells. (B) Quantification of Toll-2-HA variants immunoprecipitated with PI3K-reg-Venus in S2R<sup>+</sup> cells (example in Figure 3B). Toll-2-HA IP with PI3K-reg-Venus =  $HA_{eluted}/HA_{input}/Venus_{eluted}$ . (C) Quantification of Toll-2-V5 variants immunoprecipitated with PI3K-reg-Venus in S2R<sup>+</sup> cells (example in Figure 3C). Toll-2-V5 IP with PI3K-reg-Venus =  $V5_{eluted}/V5_{input}/Venus_{eluted}$ . (D) Quantification of Toll-2-V5 immunoprecipitated with PI3K-reg-Venus in the presence or absence of Bosutinib in S2R<sup>+</sup> cells (example in Figure 3D). (E) PI3K-reg-HA variants immunoprecipitated with Toll-2-V5 in S2R<sup>+</sup> cells. (F,G) Western blot (F) and quantification (G) of expression levels of PI3K-reg-HA variants in stage 7 embryos. Mean $\pm$ SEM, each dot is a biological replicate, \*\*p<0.01, Welch's t-test.

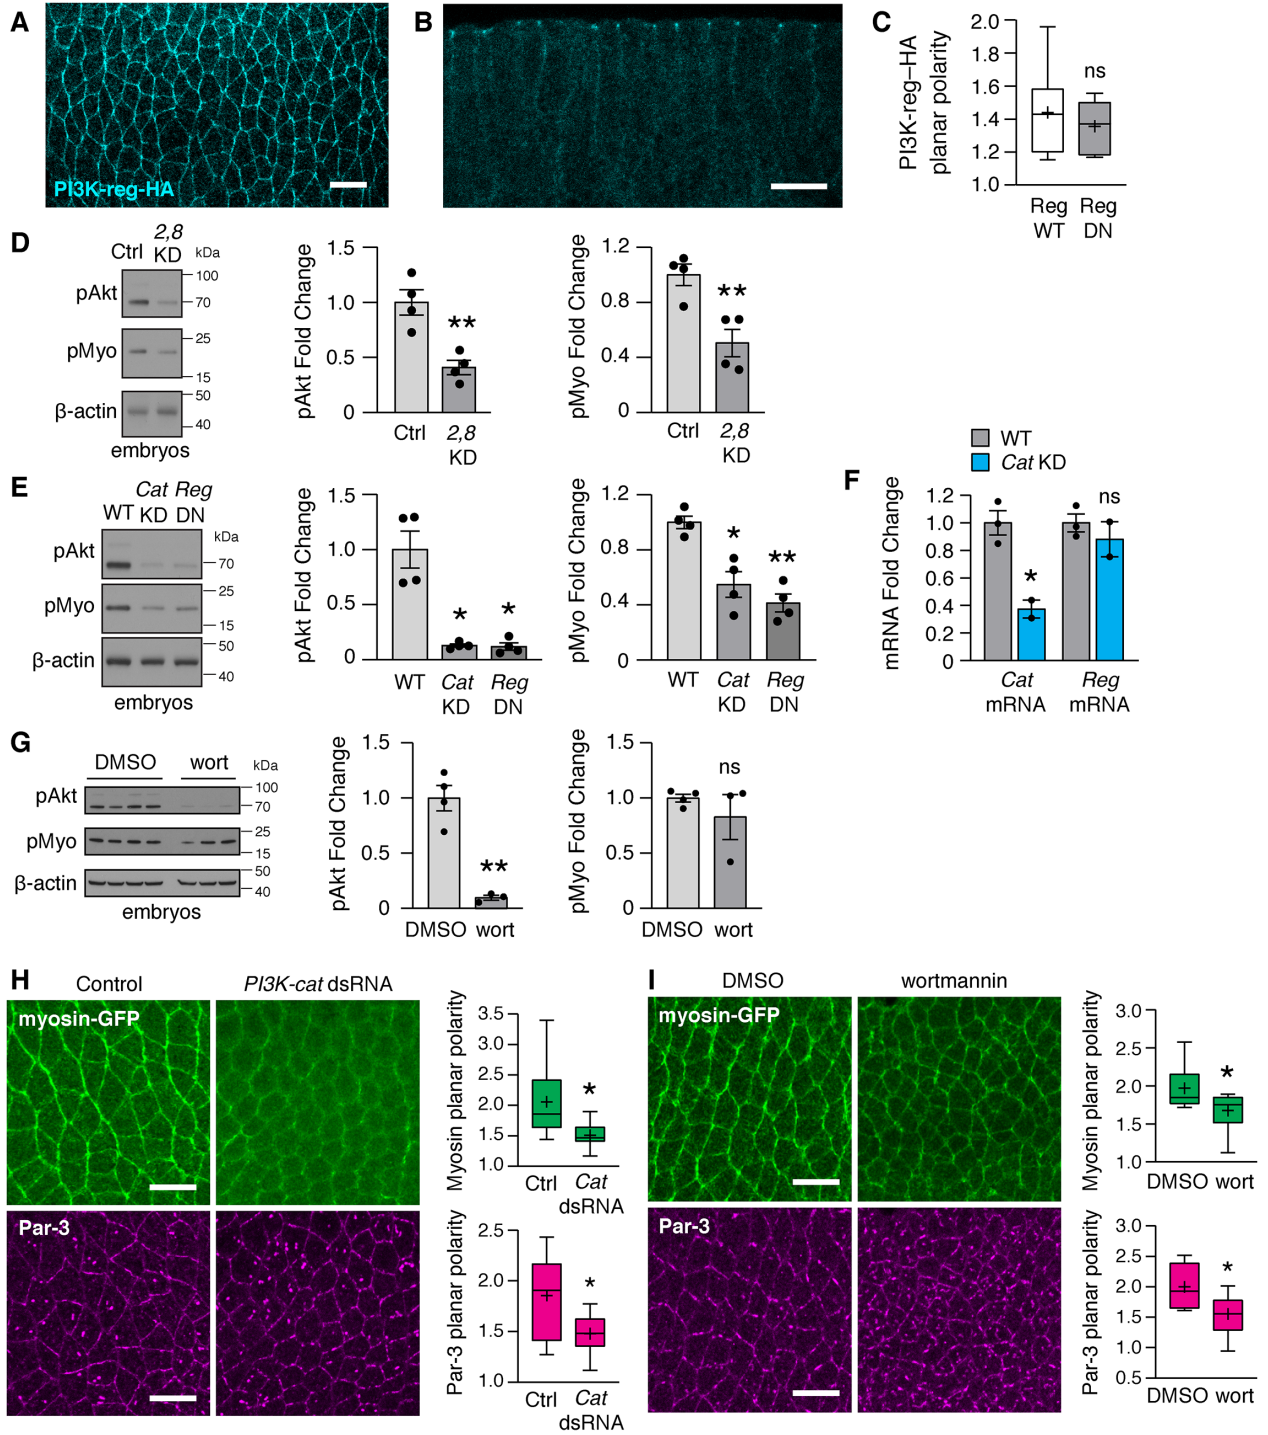

**Figure S5. Loss of PI3K disrupts myosin II and Par-3 planar polarity. Related to Figure 4.** (A,B) PI3K-reg–HA is enriched at adherens junctions in a planar polarized fashion. (C) Vertical-to-horizontal edge intensity ratio. Wild type PI3K-reg–HA and dominant negative PI3K-reg- $\Delta$ CatBD–HA (Reg DN) are both planar polarized ( $p > 0.4$ ). (D) Embryos injected with *Toll-2* and *Toll-8* dsRNAs show reduced levels of phosphorylated Akt (pAkt) (serine 505, corresponding to serine 473 in mammals) and phosphorylated myosin (pMyo) (serine 19 of the regulatory light chain) compared with *Toll-3* dsRNA-injected controls. (E) *PI3K-cat* KD and PI3K-reg DN embryos show reduced levels of pAkt and pMyo compared with wild type (WT). (F) Analysis of PI3K-reg and PI3K-cat mRNA levels in *PI3K-cat* KD embryos by quantitative RT-PCR. (G) Embryos injected with wortmannin (wort) show reduced levels of pAkt compared with control embryos injected with DMSO. (H,I) Localization of myosin II (visualized with myosin–GFP, top panels) and Par-3 (bottom panels) in embryos injected with control *Toll-3* (control), *PI3K-cat* dsRNA, DMSO (0.05% DMSO), or wortmannin (1  $\mu$ M wortmannin in 0.05% DMSO) (final concentrations). Myosin–GFP planar polarity (vertical-to-horizontal edge intensity ratio) and Par-3 planar polarity (horizontal-to-vertical edge intensity ratio) were significantly reduced in *PI3K-cat* dsRNA-injected embryos compared with *Toll-3* dsRNA-injected controls (H) and in wortmannin-injected embryos compared with DMSO-injected controls (I). (C,H,I) Boxes, 2nd and 3rd quartiles; whiskers, min to max; horizontal line, median; +, mean, 6-12 fixed stage 7 embryos/genotype. (D-G) Mean $\pm$ SEM, each dot is a biological replicate. \* $p < 0.05$ , \*\* $p < 0.009$ , Welch's t-test. Anterior left, ventral down. Bars, 10  $\mu$ m.



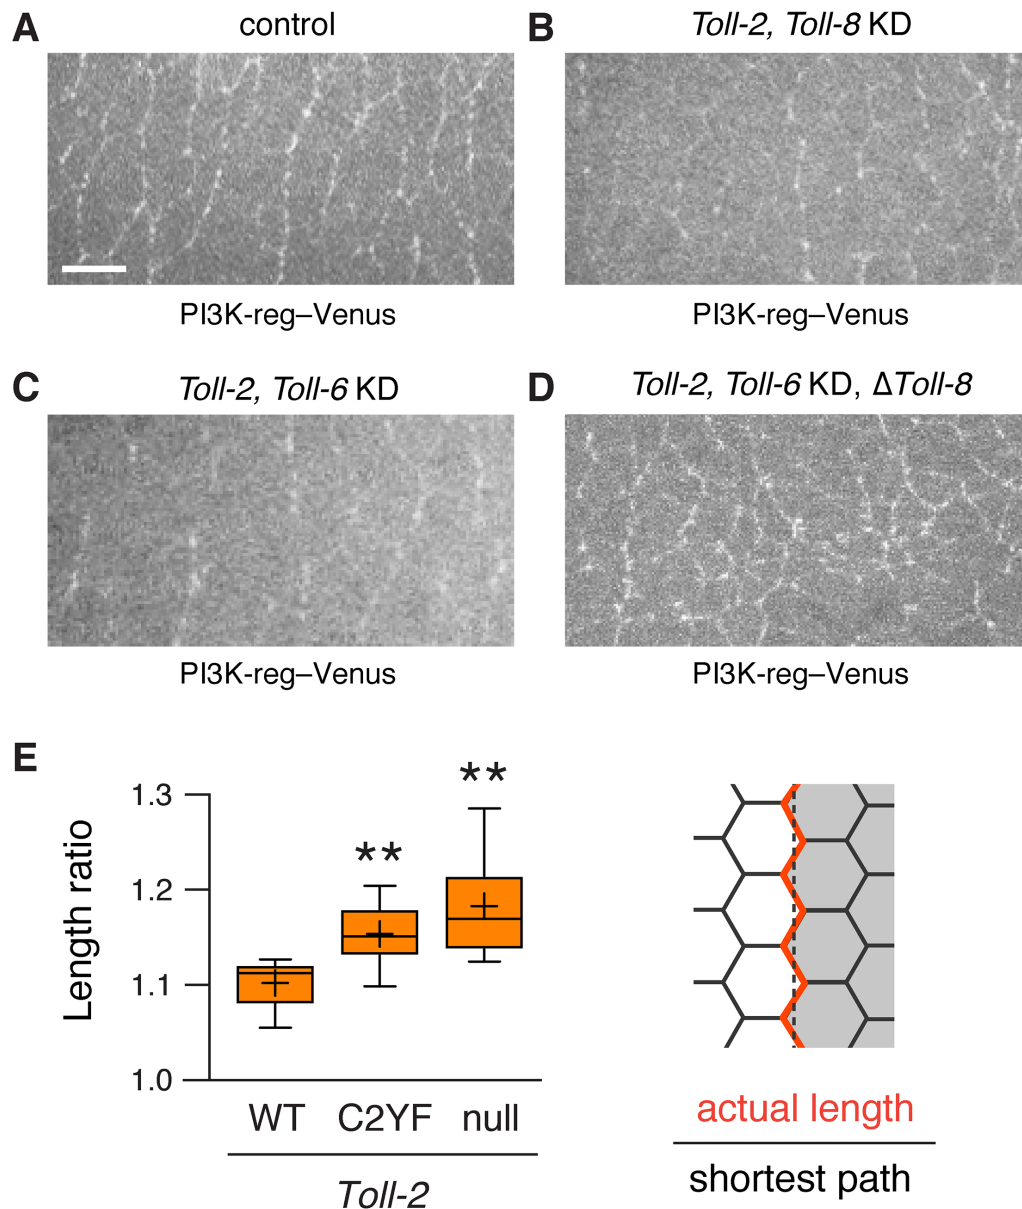

**Figure S6. Toll receptors are required for PI3K-reg planar polarity and cell shape. Related to Figures 4 and 6.** (A-D) PI3K-reg-Venus is enriched at vertical edges in control embryos injected with water (A). PI3K-reg-Venus planar polarity is reduced in embryos injected with dsRNAs targeting *Toll-2* and *Toll-8* (*Toll-2, Toll-8* KD) (B), embryos injected with dsRNAs targeting *Toll-2* and *Toll-6* (*Toll-2, Toll-6* KD) (C), and in *Toll-8* mutants injected with dsRNAs targeting *Toll-2* and *Toll-6* (*Toll-2, Toll-6* KD,  $\Delta$ *Toll-8*) (D). (E) Border length ratio (actual length divided by the shortest path) is increased at *Toll-2* stripe borders in *Toll-2*<sup>C2YF</sup> and *Toll-2*<sup>null</sup> embryos compared to *Toll-2*<sup>WT</sup>, 7-8 embryos/genotype, \*\* $p \leq 0.007$ , Welch's t-test. Living embryos are shown in (A-D). Anterior left, ventral down. Bar, 10  $\mu$ m.

**Table S1. Summary of n and p values. Related to Figures 1-7 and S1-S6.**

| Figure            | n value<br>(emb = embryos)                           | Mean $\pm$ SEM              | P value                                                                                               | Statistical test             |
|-------------------|------------------------------------------------------|-----------------------------|-------------------------------------------------------------------------------------------------------|------------------------------|
| <b>1 A</b>        | total Src42: 9 emb, 2410 edges, 12 images            | 1.174 $\pm$ 0.02            | n/a                                                                                                   | n/a                          |
|                   | pSrc42: 4 emb, 699 edges, 7 images                   | 1.69 $\pm$ 0.12             | n/a                                                                                                   | n/a                          |
| <b>1 B</b>        | WT: 3 emb, 1841 edges, 6 images                      | 1.64 $\pm$ 0.13             | p = 0.0123                                                                                            | Welch's t-test               |
|                   | <i>Toll-2,6,8</i> : 4 emb, 2410 edges, 7 images      | 1.14 $\pm$ 0.03             |                                                                                                       |                              |
| <b>2 A</b>        | WT: 4 emb, 1848 edges, 8 images                      | 3.07 $\pm$ 0.32             | p = 0.0112                                                                                            | Welch's t-test               |
|                   | <i>Src</i> KD: 4 emb, 1596 edges, 5 images           | 1.90 $\pm$ 0.22             |                                                                                                       |                              |
| <b>2 B</b>        | WT: 4 emb, 1877 edges, 8 images                      | 3.30 $\pm$ 0.19             | p = 0.0002                                                                                            | Welch's t-test               |
|                   | <i>Src</i> KD: 5 emb, 2187 edges, 10 images          | 2.13 $\pm$ 0.14             |                                                                                                       |                              |
| <b>2 C</b>        | control: 6 emb, 1081 edges, 6 images                 | 1.49 $\pm$ 0.02             | p < 0.0001                                                                                            | Welch's t-test               |
|                   | <i>Src</i> CA: 6 emb, 1199 edges, 6 images           | 1.12 $\pm$ 0.03             |                                                                                                       |                              |
| <b>2 D</b>        | control: 6 emb, 1081 edges, 6 images                 | 2.28 $\pm$ 0.14             | p < 0.0001                                                                                            | Welch's t-test               |
|                   | <i>Src</i> CA: 6 emb, 1199 edges, 6 images           | 1.25 $\pm$ 0.07             |                                                                                                       |                              |
| <b>2 G</b>        | WT: 4 emb                                            | 1.87 $\pm$ 0.06             | p = 0.0145                                                                                            | Welch's t-test (at t=30 min) |
|                   | <i>Src</i> KD: 4 emb                                 | 1.50 $\pm$ 0.09             |                                                                                                       |                              |
| <b>2 H</b>        | WT: 4 emb, 140 edges                                 | 0.62 $\pm$ 0.04 $\mu$ m/min | p = 0.004                                                                                             | Welch's t-test               |
|                   | <i>Src</i> KD: 4 emb, 134 edges                      | 0.33 $\pm$ 0.02 $\mu$ m/min |                                                                                                       |                              |
| <b>2 I</b>        | WT: 4 emb, 212 edges                                 | 22 $\pm$ 3% errors          | p = 0.0218                                                                                            | Welch's t-test               |
|                   | <i>Src</i> KD: 4 emb, 231 edges                      | 48 $\pm$ 7% errors          |                                                                                                       |                              |
| <b>4 D left</b>   | <i>Toll-3</i> control: 4 emb, 1751 edges, 5 images   | 1.81 $\pm$ 0.13             | p = 0.024                                                                                             | Welch's t-test               |
|                   | <i>Toll-2, Toll-8</i> KD: 3 emb, 846 edges, 4 images | 1.13 $\pm$ 0.19             |                                                                                                       |                              |
| <b>4 D middle</b> | DMSO: 5 emb, 715 edges, 7 images                     | 1.71 $\pm$ 0.20             | p = 0.0173                                                                                            | Welch's t-test               |
|                   | Bosutinib: 4 emb, 585 edges, 6 images                | 1.07 $\pm$ 0.09             |                                                                                                       |                              |
| <b>4 D right</b>  | WT: 5 emb, 784 edges, 8 images                       | 1.63 $\pm$ 0.18             | p = 0.0091                                                                                            | Welch's t-test               |
|                   | <i>Src</i> CA: 5 emb, 789 edges, 6 images            | 1.00 $\pm$ 0.02             |                                                                                                       |                              |
| <b>4 G left</b>   | WT: 14 emb, 3824 edges                               | 1.90 $\pm$ 0.10             | WT vs. <i>Cat</i> KD: p = 0.0009<br>WT vs. Reg DN: p < 0.0001<br><i>Cat</i> KD vs. Reg DN: p = 0.0911 | Welch's t-test               |
|                   | <i>Cat</i> KD: 11 emb, 2991 edges                    | 1.37 $\pm$ 0.10             |                                                                                                       |                              |
|                   | Reg DN: 8 emb, 1402 edges                            | 1.15 $\pm$ 0.07             |                                                                                                       |                              |

|                  |                                                       |                    |                                                                              |                                 |
|------------------|-------------------------------------------------------|--------------------|------------------------------------------------------------------------------|---------------------------------|
| <b>4 G right</b> | WT: 14 emb, 3824 edges                                | 2.00 ± 0.10        | WT vs. <i>Cat</i> KD: p < 0.0001                                             | Welch's t-test                  |
|                  | <i>Cat</i> KD: 11 emb, 2991 edges                     | 1.26 ± 0.06        | WT vs. Reg DN: p = 0.0001                                                    |                                 |
|                  | Reg DN: 8 emb, 1402 edges                             | 1.41 ± 0.07        | <i>Cat</i> KD vs. Reg DN: p = 0.1274                                         |                                 |
| <b>5 D</b>       | WT: 3 emb                                             | 2.13 ± 0.01        | WT vs. <i>Cat</i> KD: p = 0.0034                                             | Welch's t-test<br>(at t=30 min) |
|                  | <i>Cat</i> KD: 3 emb                                  | 1.31 ± 0.05        | WT vs. Reg DN: p = 0.0278                                                    |                                 |
|                  | Reg DN: 3 emb                                         | 1.46 ± 0.12        |                                                                              |                                 |
|                  | control: 3 emb                                        | 2.00 ± 0.08        | p = 0.0109                                                                   |                                 |
|                  | <i>Cat</i> dsRNA: 5 emb                               | 1.57 ± 0.06        |                                                                              |                                 |
| <b>5 E</b>       | WT: 3 emb, 135 edges                                  | 13 ± 3% errors     | WT vs. <i>Cat</i> KD: p = 0.0022                                             | Welch's t-test                  |
|                  | <i>Cat</i> KD: 3 emb, 156 edges                       | 42 ± 2% errors     | WT vs. Reg DN: p = 0.0241                                                    |                                 |
|                  | Reg DN: 3 emb, 140 edges                              | 31 ± 4% errors     | <i>Cat</i> KD vs. Reg DN: p = 0.0876                                         |                                 |
|                  | control: 3 emb, 164 edges                             | 13 ± 2% errors     | p = 0.0336                                                                   |                                 |
|                  | <i>Cat</i> dsRNA: 5 emb, 257 edges                    | 32 ± 6% errors     |                                                                              |                                 |
| <b>5 F</b>       | WT: 3 emb, 115 edges                                  | 0.95 ± 0.02 μm/min | WT vs. <i>Cat</i> KD: p = 0.0468                                             | Welch's t-test                  |
|                  | <i>Cat</i> KD: 3 emb, 104 edges                       | 0.65 ± 0.07 μm/min | WT vs. Reg DN: p = 0.0114                                                    |                                 |
|                  | Reg DN: 3 emb, 107 edges                              | 0.69 ± 0.04 μm/min | <i>Cat</i> KD vs. Reg DN: p = 0.7182                                         |                                 |
|                  | control: 3 emb, 130 edges                             | 0.96 ± 0.06 μm/min | p = 0.0436                                                                   |                                 |
|                  | <i>Cat</i> dsRNA: 5 emb, 186 edges                    | 0.73 ± 0.04 μm/min |                                                                              |                                 |
| <b>6 C</b>       | <i>Toll-2</i> <sup>WT</sup> left: 8 emb, 192 edges    | 3.32 ± 0.27        | left border: p = 0.0004                                                      | Welch's t-test                  |
|                  | <i>Toll-2</i> <sup>null</sup> left: 7 emb, 207 edges  | 1.74 ± 0.19        |                                                                              |                                 |
|                  | <i>Toll-2</i> <sup>WT</sup> int: 8 emb, 202 edges     | 5.26 ± 0.4         | internal: p = 0.1390                                                         |                                 |
|                  | <i>Toll-2</i> <sup>null</sup> int: 7 emb, 166 edges   | 4.08 ± 0.62        |                                                                              |                                 |
|                  | <i>Toll-2</i> <sup>WT</sup> right: 8 emb, 249 edges   | 2.73 ± 0.12        | right border: p = 0.0006                                                     |                                 |
|                  | <i>Toll-2</i> <sup>null</sup> right: 7 emb, 251 edges | 1.74 ± 0.17        |                                                                              |                                 |
| <b>6 H and I</b> | <i>Toll-2</i> <sup>WT</sup> : 6 emb, 362 edges        | 2.16 ± 0.16        | p = 0.0032                                                                   | Welch's t-test                  |
|                  | <i>Toll-2</i> <sup>C1,2YF</sup> : 6 emb, 336 edges    | 1.38 ± 0.07        |                                                                              |                                 |
|                  | <i>Toll-2</i> <sup>WT</sup> : 10 emb, 432 edges       | 2.25 ± 0.19        | <i>Toll-2</i> <sup>WT</sup> vs. <i>Toll-2</i> <sup>C2YF</sup> : p = 0.008    |                                 |
|                  | <i>Toll-2</i> <sup>C2YF</sup> : 8 emb, 357 edges      | 1.52 ± 0.15        | <i>Toll-2</i> <sup>WT</sup> vs. <i>Toll-2</i> <sup>null</sup> : p = 0.0013   |                                 |
|                  | <i>Toll-2</i> <sup>null</sup> : 7 emb, 385 edges      | 1.30 ± 0.15        | <i>Toll-2</i> <sup>C2YF</sup> vs. <i>Toll-2</i> <sup>null</sup> : p = 0.3141 |                                 |
| <b>6 J and K</b> | <i>Toll-2</i> <sup>WT</sup> : 6 emb, 362 edges        | 2.48 ± 0.14        | p = 0.0162                                                                   | Welch's t-test                  |
|                  | <i>Toll-2</i> <sup>C1,2YF</sup> : 6 emb, 336 edges    | 1.85 ± 0.16        |                                                                              |                                 |
|                  | <i>Toll-2</i> <sup>WT</sup> : 8 emb, 448 edges        | 3.00 ± 0.18        | <i>Toll-2</i> <sup>WT</sup> vs. <i>Toll-2</i> <sup>C2YF</sup> : p = 0.0099   |                                 |
|                  | <i>Toll-2</i> <sup>C2YF</sup> : 7 emb, 321 edges      | 2.27 ± 0.16        | <i>Toll-2</i> <sup>WT</sup> vs. <i>Toll-2</i> <sup>null</sup> : p = 0.0001   |                                 |
|                  | <i>Toll-2</i> <sup>null</sup> : 7 emb, 458 edges      | 1.72 ± 0.16        | <i>Toll-2</i> <sup>C2YF</sup> vs. <i>Toll-2</i> <sup>null</sup> : p = 0.0304 |                                 |

|            |                                                              |                |                                                                                                                                                                                                                                              |                              |
|------------|--------------------------------------------------------------|----------------|----------------------------------------------------------------------------------------------------------------------------------------------------------------------------------------------------------------------------------------------|------------------------------|
| <b>6 L</b> | <i>Toll-2</i> <sup>WT</sup> : 16 emb, 432 edges, 17 images   | 1.24 ± 0.02    | <i>Toll-2</i> <sup>WT</sup> vs. <i>Toll-2</i> <sup>C2YF</sup> : p = 0.0001<br><i>Toll-2</i> <sup>WT</sup> vs. <i>Toll-2</i> <sup>C1,2YF</sup> : p = 0.0285<br><i>Toll-2</i> <sup>C2YF</sup> vs. <i>Toll-2</i> <sup>C1,2YF</sup> : p = 0.1173 | Welch's t-test               |
|            | <i>Toll-2</i> <sup>C2YF</sup> : 7 emb, 140 edges, 7 images   | 1.07 ± 0.02    |                                                                                                                                                                                                                                              |                              |
|            | <i>Toll-2</i> <sup>C1,2YF</sup> : 6 emb, 148 edges, 6 images | 1.14 ± 0.03    |                                                                                                                                                                                                                                              |                              |
| <b>7 B</b> | <i>Toll-2</i> <sup>WT</sup> ,6,8: 4 emb                      | 1.91 ± 0.02    | <i>Toll-2</i> <sup>WT</sup> vs. <i>Toll-2</i> <sup>C2YF</sup> : p = 0.0265<br><i>Toll-2</i> <sup>WT</sup> vs. <i>Toll-2</i> <sup>null</sup> : p = 0.0006<br><i>Toll-2</i> <sup>C2YF</sup> vs. <i>Toll-2</i> <sup>null</sup> : p = 0.9317     | Welch's t-test (at t=30 min) |
|            | <i>Toll-2</i> <sup>C2YF</sup> ,6,8: 6 emb                    | 1.68 ± 0.08    |                                                                                                                                                                                                                                              |                              |
|            | <i>Toll-2</i> <sup>null</sup> ,6,8: 5 emb                    | 1.67 ± 0.03    |                                                                                                                                                                                                                                              |                              |
| <b>7 C</b> | <i>Toll-2</i> <sup>WT</sup> ,6,8: 4 emb, 200 edges           | 27 ± 2% errors | <i>Toll-2</i> <sup>WT</sup> vs. <i>Toll-2</i> <sup>C2YF</sup> : p = 0.0069<br><i>Toll-2</i> <sup>WT</sup> vs. <i>Toll-2</i> <sup>null</sup> : p = 0.0002<br><i>Toll-2</i> <sup>C2YF</sup> vs. <i>Toll-2</i> <sup>null</sup> : p = 0.4305     | Welch's t-test               |
|            | <i>Toll-2</i> <sup>C2YF</sup> ,6,8: 6 emb, 300 edges         | 44 ± 4% errors |                                                                                                                                                                                                                                              |                              |
|            | <i>Toll-2</i> <sup>null</sup> : 9 emb, 650 edges             | 48 ± 3% errors |                                                                                                                                                                                                                                              |                              |
| <b>S1E</b> | WT horiz: 3 emb, 196 edges                                   | 2.67 ± 0.15    | WT horiz vs. <i>Toll-2,6,8</i> horiz: p = 0.7551<br><br>WT vertical vs. <i>Toll-2,6,8</i> vertical: p = 0.0022                                                                                                                               | Welch's t-test               |
|            | <i>Toll-2,6,8</i> horiz: 4 emb, 301 edges                    | 2.60 ± 0.15    |                                                                                                                                                                                                                                              |                              |
|            | WT vertical: 3 emb, 395 edges                                | 3.94 ± 0.21    |                                                                                                                                                                                                                                              |                              |
|            | <i>Toll-2,6,8</i> vertical: 4 emb, 343 edges                 | 2.86 ± 0.13    |                                                                                                                                                                                                                                              |                              |
| <b>S1F</b> | WT: 4 emb, 2407 edges, 8 images                              | 1.606 ± 0.1    | WT vs. <i>Toll-2</i> : p = 0.004<br>WT vs. <i>Toll-6,8</i> : p = 0.014<br>WT vs. <i>Toll-2,6,8</i> : p = 0.003                                                                                                                               | Welch's t-test               |
|            | <i>Toll-2</i> : 4 emb, 2551 edges, 8 images                  | 1.2 ± 0.05     |                                                                                                                                                                                                                                              |                              |
|            | <i>Toll-6,8</i> : 3 emb, 1855 edges, 6 images                | 1.27 ± 0.05    |                                                                                                                                                                                                                                              |                              |
|            | <i>Toll-2,6,8</i> : 5 emb, 3474 edges, 10 images             | 1.18 ± 0.03    |                                                                                                                                                                                                                                              |                              |
| <b>S1I</b> | WT non-8: 4 emb, 862 edges                                   | 1.476 ± 0.15   | WT vs. <i>Toll-2</i> (non-Toll-8 cells): p = 0.03<br>WT vs. <i>Toll-2</i> (Toll-8 cells): p = 0.1502                                                                                                                                         | Welch's t-test               |
|            | <i>Toll-2</i> non-8: 4 emb, 647 edges                        | 0.917 ± 0.07   |                                                                                                                                                                                                                                              |                              |
|            | WT 8: 4 emb, 1137 edges                                      | 1.33 ± 0.02    |                                                                                                                                                                                                                                              |                              |
|            | <i>Toll-2</i> 8: 4 emb, 1007 edges                           | 1.2 ± 0.07     |                                                                                                                                                                                                                                              |                              |
| <b>S1K</b> | WT: 3 emb, 1362 edges, 6 images                              | 1.14 ± 0.03    | p = 0.2056                                                                                                                                                                                                                                   | Welch's t-test               |
|            | <i>Toll-2,6,8</i> : 3 emb, 1751 edges, 6 images              | 1.07 ± 0.04    |                                                                                                                                                                                                                                              |                              |
| <b>S3B</b> | Src42: 23 emb                                                | 33 ± 5%        | n/a                                                                                                                                                                                                                                          | n/a                          |
|            | Src64: 23 emb                                                | 20 ± 4%        | n/a                                                                                                                                                                                                                                          | n/a                          |
| <b>S3D</b> | WT: 4 emb, 1877 edges, 8 images                              | 26.05 ± 1.202  | p < 0.0001                                                                                                                                                                                                                                   | Welch's t-test               |
|            | Src KD: 5 emb, 2187 edges, 10 images                         | 4.040 ± 0.5815 |                                                                                                                                                                                                                                              |                              |
| <b>S3F</b> | WT: 5 emb, 2236 edges, 9 images                              | 2.60 ± 0.25    | p = 0.0085                                                                                                                                                                                                                                   | Welch's t-test               |
|            | Src DN: 4 emb, 2439 edges, 9 images                          | 1.75 ± 0.08    |                                                                                                                                                                                                                                              |                              |
| <b>S3G</b> | WT: 5 emb, 2236 edges, 9 images                              | 2.85 ± 0.10    | p < 0.0001                                                                                                                                                                                                                                   | Welch's t-test               |
|            | Src DN: 4 emb, 2439 edges, 9 images                          | 1.32 ± 0.07    |                                                                                                                                                                                                                                              |                              |

|                  |                                                  |             |                                                                                                              |                                 |
|------------------|--------------------------------------------------|-------------|--------------------------------------------------------------------------------------------------------------|---------------------------------|
| <b>S3K</b>       | WT: 3 emb, 1186 edges, 6 images                  | 2.20 ± 0.13 | p = 0.3382                                                                                                   | Welch's t-test                  |
|                  | <i>Src42 gRNA</i> : 7 emb, 1683 edges, 9 images  | 2.01 ± 0.13 |                                                                                                              |                                 |
| <b>S3L</b>       | WT: 3 emb, 1186 edges, 6 images                  | 2.41 ± 0.21 | p = 0.2215                                                                                                   | Welch's t-test                  |
|                  | <i>Src42 gRNA</i> : 7 emb, 1683 edges, 9 images  | 2.10 ± 0.11 |                                                                                                              |                                 |
| <b>S3N</b>       | WT: 3 emb, 1444 edges, 6 images                  | 2.09 ± 0.18 | p = 0.672                                                                                                    | Welch's t-test                  |
|                  | <i>Src64 shRNA</i> : 3 emb, 1555 edges, 6 images | 1.98 ± 0.17 |                                                                                                              |                                 |
| <b>S3O</b>       | WT: 3 emb, 1444 edges, 6 images                  | 2.75 ± 0.28 | p = 0.6222                                                                                                   | Welch's t-test                  |
|                  | <i>Src64 shRNA</i> : 3 emb, 1555 edges, 6 images | 2.58 ± 0.18 |                                                                                                              |                                 |
| <b>S3P</b>       | WT: 3 emb                                        | 2.06 ± 0.03 | p = 0.0085                                                                                                   | Welch's t-test<br>(at t=30 min) |
|                  | <i>Src42 gRNA</i> : 4 emb                        | 1.74 ± 0.06 |                                                                                                              |                                 |
| <b>S3Q</b>       | WT: 3 emb                                        | 1.96 ± 0.05 | p = 0.2994                                                                                                   | Welch's t-test<br>(at t=30 min) |
|                  | <i>Src64 shRNA</i> : 3 emb                       | 1.86 ± 0.06 |                                                                                                              |                                 |
| <b>S4B</b>       | WT: n = 3                                        | 1.00 ± 0.00 | WT vs. Δcyto: p = 0.0002<br>WT vs. ΔTIR: p = 0.3361<br>WT vs. ΔCTD: p = 0.0003                               | Welch's t-test                  |
|                  | Δcyto: n = 3                                     | 0.01 ± 0.01 |                                                                                                              |                                 |
|                  | ΔTIR: n = 3                                      | 1.24 ± 0.19 |                                                                                                              |                                 |
|                  | ΔCTD: n = 3                                      | 0.03 ± 0.02 |                                                                                                              |                                 |
| <b>S4C</b>       | WT: n = 3                                        | 1.00 ± 0.00 | WT vs. C2YF: p = 0.0005<br>WT vs. C1YF: p = 0.0099<br>WT vs. TIR-YF: p = 0.4542<br>WT vs. C1,2YF: p = 0.0041 | Welch's t-test                  |
|                  | C2YF: n = 3                                      | 0.16 ± 0.02 |                                                                                                              |                                 |
|                  | C1YF: n = 3                                      | 0.27 ± 0.07 |                                                                                                              |                                 |
|                  | TIR-YF: n = 3                                    | 1.52 ± 0.57 |                                                                                                              |                                 |
|                  | C1,2YF: n = 3                                    | 0.14 ± 0.05 |                                                                                                              |                                 |
| <b>S4D</b>       | DMSO: n = 5                                      | 1.00 ± 0.10 | p = 0.0004                                                                                                   | Welch's t-test                  |
|                  | Bosutinib: n = 3                                 | 0.12 ± 0.05 |                                                                                                              |                                 |
| <b>S4G</b>       | WT: n = 4                                        | 1.00 ± 0.02 | WT vs. ΔNSH2: p = 0.4045<br>WT vs. ΔCSH2: p = 0.3501<br>WT vs. ΔSH2: p = 0.0009<br>WT vs. ΔCatBD: p = 0.5080 | Welch's t-test                  |
|                  | ΔNSH2: n = 4                                     | 1.05 ± 0.05 |                                                                                                              |                                 |
|                  | ΔCSH2: n = 4                                     | 1.09 ± 0.08 |                                                                                                              |                                 |
|                  | ΔSH2: n = 4                                      | 0.31 ± 0.06 |                                                                                                              |                                 |
|                  | ΔCatBD: n = 3                                    | 0.60 ± 0.50 |                                                                                                              |                                 |
| <b>S5C</b>       | Reg WT: 8 emb, 4035 edges, 8 images              | 1.44 ± 0.09 | p = 0.4728                                                                                                   | Welch's t-test                  |
|                  | Reg DN: 6 emb, 3011 edges, 6 images              | 1.36 ± 0.06 |                                                                                                              |                                 |
| <b>S5D left</b>  | <i>Toll-3</i> dsRNA control: n = 4               | 1.00 ± 0.11 | p = 0.0075                                                                                                   | Welch's t-test                  |
|                  | <i>Toll-2, Toll-8</i> KD: n = 4                  | 0.41 ± 0.06 |                                                                                                              |                                 |
| <b>S5D right</b> | <i>Toll-3</i> dsRNA control: n = 4               | 1.00 ± 0.08 | p = 0.0087                                                                                                   | Welch's t-test                  |
|                  | <i>Toll-2, Toll-8</i> KD: n = 4                  | 0.50 ± 0.10 |                                                                                                              |                                 |

|                   |                                                                                                                                                                        |                                                                                                                                      |                                                                                                                                                                                                                                          |                |
|-------------------|------------------------------------------------------------------------------------------------------------------------------------------------------------------------|--------------------------------------------------------------------------------------------------------------------------------------|------------------------------------------------------------------------------------------------------------------------------------------------------------------------------------------------------------------------------------------|----------------|
| <b>S5E left</b>   | WT: n = 4<br><i>Cat</i> KD: n = 4<br>Reg DN: n = 4                                                                                                                     | 1.00 ± 0.17<br>0.13 ± 0.01<br>0.12 ± 0.03                                                                                            | WT vs. <i>Cat</i> KD: p = 0.0135<br>WT vs. Reg DN: p = 0.0116                                                                                                                                                                            | Welch's t-test |
| <b>S5E right</b>  | WT: n = 4<br><i>Cat</i> KD: n = 4<br>Reg DN: n = 4                                                                                                                     | 1.00 ± 0.05<br>0.55 ± 0.09<br>0.41 ± 0.07                                                                                            | WT vs. <i>Cat</i> KD: p = 0.0099<br>WT vs. Reg DN: p = 0.0005                                                                                                                                                                            | Welch's t-test |
| <b>S5F</b>        | WT: n = 3<br><i>Cat</i> KD: n = 2                                                                                                                                      | 1.00 ± 0.09 ( <i>Cat</i> mRNA)<br>1.00 ± 0.07 ( <i>Reg</i> mRNA)<br>0.37 ± 0.07 ( <i>Cat</i> mRNA)<br>0.88 ± 0.13 ( <i>Reg</i> mRNA) | WT vs. <i>Cat</i> KD: p = 0.0107 ( <i>Cat</i> mRNA)<br>WT vs. <i>Cat</i> KD: p = 0.5118 ( <i>Reg</i> mRNA)                                                                                                                               | Welch's t-test |
| <b>S5G left</b>   | DMSO: n = 4<br>wortmannin: n = 3                                                                                                                                       | 1.00 ± 0.12<br>0.10 ± 0.02                                                                                                           | p = 0.0035                                                                                                                                                                                                                               | Welch's t-test |
| <b>S5G right</b>  | DMSO: n = 4<br>wortmannin: n = 3                                                                                                                                       | 1.00 ± 0.04<br>0.83 ± 0.20                                                                                                           | p = 0.4909                                                                                                                                                                                                                               | Welch's t-test |
| <b>S5H top</b>    | <i>Toll-3</i> dsRNA control: 8 emb, 2699 edges<br><i>Cat</i> dsRNA: 10 emb, 3350 edges                                                                                 | 2.06 ± 0.23<br>1.51 ± 0.06                                                                                                           | p = 0.0481                                                                                                                                                                                                                               | Welch's t-test |
| <b>S5H bottom</b> | <i>Toll-3</i> dsRNA control: 8 emb, 2699 edges<br><i>Cat</i> dsRNA: 10 emb, 3350 edges                                                                                 | 1.86 ± 0.15<br>1.48 ± 0.06                                                                                                           | p = 0.0429                                                                                                                                                                                                                               | Welch's t-test |
| <b>S5I top</b>    | DMSO: 8 emb, 2841 edges<br>wortmannin: 12 emb, 4314 edges                                                                                                              | 1.97 ± 0.10<br>1.68 ± 0.07                                                                                                           | p = 0.0331                                                                                                                                                                                                                               | Welch's t-test |
| <b>S5I bottom</b> | DMSO: 8 emb, 2841 edges<br>wortmannin: 12 emb, 4314 edges                                                                                                              | 2.00 ± 0.13<br>1.55 ± 0.09                                                                                                           | p = 0.0151                                                                                                                                                                                                                               | Welch's t-test |
| <b>S6E</b>        | <i>Toll-2</i> <sup>WT</sup> : 8 emb, 2-4 borders/emb<br><i>Toll-2</i> <sup>C2YF</sup> : 8 emb, 2 borders/emb<br><i>Toll-2</i> <sup>null</sup> : 7 emb, 2-4 borders/emb | 1.10 ± 0.01<br>1.15 ± 0.01<br>1.18 ± 0.02                                                                                            | <i>Toll-2</i> <sup>WT</sup> vs. <i>Toll-2</i> <sup>C2YF</sup> : p = 0.0043<br><i>Toll-2</i> <sup>WT</sup> vs. <i>Toll-2</i> <sup>null</sup> : p = 0.0071<br><i>Toll-2</i> <sup>C2YF</sup> vs. <i>Toll-2</i> <sup>null</sup> : p = 0.2521 | Welch's t-test |

**Table S2. Oligonucleotides used in this study. Related to Figures 1-7 and S1-S6.**

| Project                                          | Identifier                 | Sequence                                                         |
|--------------------------------------------------|----------------------------|------------------------------------------------------------------|
| <i>pUASp-W-HA (insert)</i>                       | 1xHA C-term Fwd            | AAAGCAGGCTCCGCGGCCGCCCCCTTCACCACGCGTTACC<br>CATACGATGTT          |
|                                                  | 1xHA C-term Rev            | CAAGAAAGCTGGGTGCGCGGCCACCCTTTTAAGCGTAA<br>TCTGGAACAT             |
| <i>pUASp-W-V5 (insert)</i>                       | V5 C-term Fwd              | GATCCGGTAAGCCTATCCCTAACCCCTCTCCTCGGTCTCGA<br>TTCTACGTAAA         |
|                                                  | V5 C-term Rev              | CGCGTTTACGTAGAATCGAGACCGAGGAGAGGGTTAGGGA<br>TAGGCTTACCG          |
| <i>pUASp-PI3K-reg-Venus</i>                      | UASp-Pi3K21B-C-msVenus Fwd | AAAGCAGGCTCCGCGGCCGCCCCCTTCACCATGCGGCCAC<br>AGGCGCCCGGATCGCTGGTC |
|                                                  | UASp-Pi3K21B-C-msVenus Rev | GCCTGAAGAACCCTGGACCCCGAACTTCCCTGCGATGTG<br>CTGAAGTTGGAGGGCG      |
| <i>pUASp-PI3K-reg-HA</i>                         | 21B_nterm_F                | CCGCGGCCGCCCCCTTCACCGATGCGGCCACAGGCGC                            |
|                                                  | 21B_cterm_cHA_R            | CTGGAACATCGTATGGGTACTGCGATGTGCTGAAGTTGGA<br>GGGCG                |
|                                                  | 21B_cterm_cHA_F            | GCCCTCCAACCTCAGCACATCGCAGTACCCATACGATGTT<br>CCAGATTAC            |
|                                                  | UASp-W-cHA_R               | CTGGGTGCGCGGCCACCCTTATTAAGCGTAATCTGGAA<br>CATCGTATGG             |
| <i>pUASp-PI3K-reg-<math>\Delta</math>NSH2-HA</i> | 21B_nterm_F                | CCGCGGCCGCCCCCTTCACCGATGCGGCCACAGGCGC                            |
|                                                  | 21B_no_NSH2_R              | GCTGCGACTCCTCATCCTCCATGCGTAGCTCGTCTCGTT<br>G                     |
|                                                  | 21B_no_NSH2_F              | CAACGAGGACGAGCTACGCATGGAGGATGAGGAGTCGCAG<br>C                    |
|                                                  | 21B_cterm_cHA_R            | CTGGAACATCGTATGGGTACTGCGATGTGCTGAAGTTGGA<br>GGGCG                |
|                                                  | 21B_cterm_cHA_F            | GCCCTCCAACCTCAGCACATCGCAGTACCCATACGATGTT<br>CCAGATTAC            |
|                                                  | UASp-W-cHA_R               | CTGGGTGCGCGGCCACCCTTATTAAGCGTAATCTGGAA<br>CATCGTATGG             |
| <i>pUASp-PI3K-reg-<math>\Delta</math>CSH2-HA</i> | 21B_nterm_F                | CCGCGGCCGCCCCCTTCACCGATGCGGCCACAGGCGC                            |
|                                                  | 21B_no_CSH2_R              | CAGCGTGTGTTATGCTCTTCGTTGCTGTGCGGCTG                              |
|                                                  | 21B_no_CSH2_F              | CAGCCGCACAGCAACGAAGAGCATAACGACACGCTG                             |
|                                                  | 21B_cterm_cHA_R            | CTGGAACATCGTATGGGTACTGCGATGTGCTGAAGTTGGA<br>GGGCG                |
|                                                  | 21B_cterm_cHA_F            | GCCCTCCAACCTCAGCACATCGCAGTACCCATACGATGTT<br>CCAGATTAC            |
|                                                  | UASp-W-cHA_R               | CTGGGTGCGCGGCCACCCTTATTAAGCGTAATCTGGAA<br>CATCGTATGG             |
| <i>pUASp-PI3K-reg-<math>\Delta</math>SH2-HA</i>  | 21B_nterm_F                | CCGCGGCCGCCCCCTTCACCGATGCGGCCACAGGCGC                            |
|                                                  | 21B_noSH2_nterm_R          | GCGGCTGCGACTCCTCATCCTCCATGCGTAGCTCGTCTC                          |
|                                                  | 21B_noSH2_midterm_F        | GAGGACGAGCTACGCATGGAGGATGAGGAGTCGCAGCCGC                         |

|                                           |                           |                                                        |
|-------------------------------------------|---------------------------|--------------------------------------------------------|
|                                           | 21B_noSH2_midterm_R       | GGTCAGCGTGTGCTTATGCTCTTCGTTGCTGTGCGGCTGG               |
|                                           | 21B_noSH2_cterm_F         | CCAGCCGCACAGCAACGAAGAGCATAACGACACGCTGACC               |
|                                           | 21B_cterm_cHA_R           | CTGGAACATCGTATGGGTACTGCGATGTGCTGAAGTTGGA<br>GGGCG      |
|                                           | 21B_cterm_cHA_F           | GCCCTCCAACCTCAGCACATCGCAGTACCCATACGATGTT<br>CCAGATTAC  |
|                                           | UASp-W-cHA_R              | CTGGGTGGCGCGCCACCCTTATTAAGCGTAATCTGGAA<br>CATCGTATGG   |
| <i>pUASp-PI3K-reg-<br/>ΔCatBD-HA (DN)</i> | 21B_nterm_F               | CCGCGGCCGCCCTTCACCGATGCGGCCACAGGCGC                    |
|                                           | 21B_iSH2nfrag_to_linker_R | CCGCTGGACCCCGAACTTCCGCGGAATATCTTCTCTGTAT<br>TCCCG      |
|                                           | 21B_iSH2nfrag_to_linker_F | CGGGAATACAGAGAAGATATTCGCGGAAGTTCGGGGTCC<br>AGCGG       |
|                                           | 21B_linker_to_iSH2cfrag_R | GTACTTGTCTTGGCGAACTGGGAACTGCCTGAAGAACCG<br>C           |
|                                           | 21B_linker_to_iSH2cfrag_F | GCGGTTCTTCAGGCAGTCCCAGTTGCGCAAGGACAAGTA<br>C           |
|                                           | 21B_cterm_cHA_R           | CTGGAACATCGTATGGGTACTGCGATGTGCTGAAGTTGGA<br>GGGCG      |
|                                           | 21B_cterm_cHA_F           | GCCCTCCAACCTCAGCACATCGCAGTACCCATACGATGTT<br>CCAGATTAC  |
|                                           | UASp-W-cHA_R              | CTGGGTGGCGCGCCACCCTTATTAAGCGTAATCTGGAA<br>CATCGTATGG   |
|                                           | GSS_Linker_sense          | GGAAGTTCGGGGTCCAGCGTTCTTCAGGCAGTTCC                    |
|                                           | GSS_Linker_antisense      | GGAAGTTCGGGGTCCAGCGTTCTTCAGGCAGTTCC                    |
| <i>pCS2-PI3K-reg-HA</i>                   | pcs2-21bcHA-f             | GGATCCCATCGATTTCGATGCGGCCACAGGCG                       |
|                                           | pcs2-21bcHA-r             | GAGGCTCGAGAGGCCTTGTTAAGCGTAATCTGGAACATCG               |
| <i>pUASp-Toll-2-V5</i>                    | UASp-Toll-2-V5_f          | AAGCAGGCTCCGCGCCGCCCTTCACCGATGCCAGCCA<br>CATCTTCCA     |
|                                           | UASp-Toll-2-V5_r          | CCGAGGAGAGGGTTAGGATAGGCTTACCGACCAGGAAAG<br>CTTGCCGTTTC |
| <i>pUASp-Toll-2<sup>C1YF</sup>-V5</i>     | KSB047 (UASp_F_forSDM)    | AAAGCAGGCTCCGCGCCGCCCTTCACC                            |
|                                           | KSB056 (2_Y1228F_SDM_r)   | CGTGGTGGCTGAGCTAAAGTTCGCTCCATTTCTCGGTG                 |
|                                           | KSB055 (2_Y1228F_SDM_f)   | CACCGAGGAAATGGAGGCGAACTTTAGCTCAGCCACCAGC               |
|                                           | KSB048 (UASp_R_forSDM)    | CAAGAAAGCTGGGTGCGCGCCACCCTT                            |
| <i>pUASp-Toll-2<sup>C2YF</sup>-V5</i>     | MT001                     | CGCGGCCGCCCTTCACCGAT                                   |
|                                           | MT002                     | CGATGCTGTGGAAGATGTGCTCTGAGGGC                          |
|                                           | MT003                     | GAGCACATCTTCCACAGCATCG                                 |
|                                           | MT004                     | GGTTAGGATAGGCTTACCGAC                                  |



|                                         |                          |                                                                                                                                                                                                                                                                                                                                                                                                                                                                                                                                                              |
|-----------------------------------------|--------------------------|--------------------------------------------------------------------------------------------------------------------------------------------------------------------------------------------------------------------------------------------------------------------------------------------------------------------------------------------------------------------------------------------------------------------------------------------------------------------------------------------------------------------------------------------------------------|
| <i>pUASp-Toll-2<sup>C1,2YF</sup>-V5</i> | KSB047 (UASp_F_forSDM)   | AAAGCAGGCTCCGCGGCCGCCCTTCACC                                                                                                                                                                                                                                                                                                                                                                                                                                                                                                                                 |
|                                         | KSB014 (Toll2_R7)        | CAGCTCAATTGGGATGGCGT                                                                                                                                                                                                                                                                                                                                                                                                                                                                                                                                         |
|                                         | gBlock GB004             | ACGCCATCCCAATTGAGCTGTGCCCCGTGGAACAACCTT<br>CACATTGGACCATCATGAGCGCTTCAAGCAGCCAGTGTGCG<br>CCGGCATGATCTTCCGCCAGGCGCCACCACCGCCAGCCT<br>TCTTGTGCACCGAGGAAATGGAGGCGAACTTTAGCTCAGC<br>CACCACGGCCACGCCATCACCACGCCAACGAGACCAGGA<br>GGAGCCGCTAGGATCGTGGACTCTATGCCCATGCCGATGC<br>GTCCGCCCTCAGAGCACATCTTCCACAGCATCGAGTCGGA<br>GTTTCAGTGCCTTGTATCAGCATGAGGCGCTGTGATGATT<br>CCCACGGGCCTAATGCATCAGCACCAGCAGCAGCAGTTCG<br>GTCTGCATCAGCAACAACAAGCAGCAGCAACAGCGCTT<br>GCTGCAACCGCAGTTCGGGGCGATGCCGAGCAGGCGATT<br>CCCGCTCCTTCCGCGCCGGTGCACCTGCGCAGCGGCAGTG<br>GTTTGTAGCCAGGCCAG |
|                                         | KSB006 (Toll2-F8)        | GTGGTTTGTAGCCAGGCCAG                                                                                                                                                                                                                                                                                                                                                                                                                                                                                                                                         |
|                                         | KSB048 (UASp_R_forSDM)   | CAAGAAAGCTGGGTCGGCGCGCCACCCTT                                                                                                                                                                                                                                                                                                                                                                                                                                                                                                                                |
| <i>pUASp-Toll-2<sup>TIR-YF</sup>-V5</i> | KSB033 (UASp-Toll2-GA-F) | AAAGCAGGCTCCGCGGCCGCCCTTACCATGCCAGCCA<br>CATCTTCCATC                                                                                                                                                                                                                                                                                                                                                                                                                                                                                                         |
|                                         | KSB035 (Toll2_R10)       | GATGGCGTCGAACAGTTTCCGGGCATC                                                                                                                                                                                                                                                                                                                                                                                                                                                                                                                                  |
|                                         | gBlock GB010             | CTGTTTCGACGCCATCATCCTGCACTCGGAGAAGGACTTCG<br>AGTTTGTGTGCCGAACATCGCCGCCAACTGGAGCATGG<br>TCGACCACCCTTCCGGCTTGCATTCAGCAGCGAGATCTG<br>CCTCCCCAGGCATCCCACCTTTCAGCTGGTGGAGGGAGCAA<br>GGGCGTCGAGGAAGATCATCCTGGTGTGACCCGCAATCT<br>CTTGGCCACCGAATGGAATCGCATTGAGTTCCGTAATGCT<br>TTCCACGAGTCCCTGAGGGGCTTGGCCAGAAGCTGGTGA<br>TCATCGAGGAGACAAGTGTTCGCGCCGAGGCCGAGGACGT<br>TGCCGAGTTGTGCGCGTTCCTTGAATCGGTACCCTCCAAC<br>CGACTGCTGACCTGCGACAGATTCCTTCTGGGAGAAGCTGC<br>GCTTC                                                                                                  |
|                                         | KSB036 (Toll2_F9)        | GAAGCTGCGCTTCGCCATCCCAATTG                                                                                                                                                                                                                                                                                                                                                                                                                                                                                                                                   |
|                                         | UASp-Toll-2-V5_r         | CCGAGGAGAGGGTTAGGGATAGGCTTACCGACCAGGAAAG<br>CTTGGCCGTTT                                                                                                                                                                                                                                                                                                                                                                                                                                                                                                      |
| <i>pUASp-Toll-6-V5</i>                  | UASp-Toll-6_f            | AAAGCAGGCTCCGCGGCCGCCCTTACCATGATCTACT<br>ATATGCTACTC                                                                                                                                                                                                                                                                                                                                                                                                                                                                                                         |
|                                         | UASp-Toll-6-V5_r         | CCGAGGAGAGGGTTAGGGATAGGCTTACCGCCACAGGT<br>TCTTCTGCTGATCG                                                                                                                                                                                                                                                                                                                                                                                                                                                                                                     |
| <i>pUASp-Toll-8-V5</i>                  | UASp-Toll-8_f            | AAAGCAGGCTCCGCGGCCGCCCTTACCATGCTGGCCA<br>CCAC                                                                                                                                                                                                                                                                                                                                                                                                                                                                                                                |
|                                         | UASp-Toll-8-V5_r         | CCGAGGAGAGGGTTAGGGATAGGCTTACCCATGTGCAGAT<br>TTCTAGACGCC                                                                                                                                                                                                                                                                                                                                                                                                                                                                                                      |
| <i>pUASp-Toll-2-Δcyto-HA</i>            | Toll2:HA 1xHA Fwd        | AAAGCAGGCTCCGCGGCCGCCCTTACCATGCCAGCCA<br>CATCTTCCATC                                                                                                                                                                                                                                                                                                                                                                                                                                                                                                         |
|                                         | Toll2:HADEL Cyto Rev     | TTAAGCGTAATCTGGAACATCGTATGGGTACTCGAAGCGG<br>GGCTCGCACACC                                                                                                                                                                                                                                                                                                                                                                                                                                                                                                     |
| <i>pUASp-Toll-2-ΔTIR-HA</i>             | Toll2:HA 1xHA Fwd        | AAAGCAGGCTCCGCGGCCGCCCTTACCATGCCAGCCA<br>CATCTTCCATC                                                                                                                                                                                                                                                                                                                                                                                                                                                                                                         |
|                                         | Toll2:HADEL TIR R1       | GGCGACAGCTCAATTGGGATGGCGTTTTGCCGGCATCCTC<br>GAAGCGGGGC                                                                                                                                                                                                                                                                                                                                                                                                                                                                                                       |

|                                             |                           |                                                                |
|---------------------------------------------|---------------------------|----------------------------------------------------------------|
|                                             | Toll2:HADEL TIR F2        | GCCCCGCTTCGAGGATGCCGGCAAACGCCATCCCAATTG<br>AGCTGTCGCC          |
|                                             | Toll2:HADEL TIR R2        | TTAAGCGTAATCTGGAACATCGTATGGGTAGACCAGGAAA<br>GCTTGGCCGT         |
| <i>pUASp-Toll-2-ΔCTD-HA</i>                 | Toll2:HA 1xHA Fwd         | AAAGCAGGCTCCGCGGCCGCCCCCTTCACCATGCCAGCCA<br>CATCTTCCATC        |
|                                             | Toll2:HADEL C- Rev        | CTTTTAAGCGTAATCTGGAACATCGTATGGGTATGGTGAT<br>GGCGTGGCCGTGG      |
| <i>pUASp-Toll-2-Y1056F-HA</i>               | KSB047 (UASp_F_forSDM)    | AAAGCAGGCTCCGCGGCCGCCCCCTTCACC                                 |
|                                             | KSB039 (SDM_2_1056_R2)    | GAGTGCAGGATGATGGCG                                             |
|                                             | KSB038 (SDM_2_Y1056F_F2)  | GGAGAAGGACTTCGAGTTTGTGTG                                       |
|                                             | KSB048 (UASp_R_forSDM)    | CAAGAAAGCTGGGTCCGCGCGCCACCCCTT                                 |
| <i>pUASp-Toll-2-Y1191F-HA</i>               | KSB047 (UASp_F_forSDM)    | AAAGCAGGCTCCGCGGCCGCCCCCTTCACC                                 |
|                                             | KSB042 (SDB_2_Y1191_R2)   | CGGGGCGACAGCTCAATT                                             |
|                                             | KSB041 (SDM_2_Y1191F_F2)  | TGAAACAACCTTCACATTGGACCATC                                     |
|                                             | KSB048 (UASp_R_forSDM)    | CAAGAAAGCTGGGTCCGCGCGCCACCCCTT                                 |
| <i>pCFD3-Src42-gRNA</i>                     | Src42-gRNA_f              | GTCGAAACCTACCAATAGGGTGAC                                       |
|                                             | Src42-gRNA_r              | AAACGTCACCCTATTGGTAGGTTT                                       |
| <i>pEntr-Src42</i>                          | pEntr-Src42_f             | CACCATGGGTAAGTGCCTCACC                                         |
|                                             | pEntr-Src42_r             | GTAGGCCTGCGCCTCTTTGTAGTCG                                      |
| <i>pEntr-Src64</i>                          | pEntr-Src64_f             | CACCATGGGCAACAAATGCTGCAGC                                      |
|                                             | pEntr-Src64_r             | GTCTTGACCTCTCGATACG                                            |
| <i>pEntr-Src42-K276R-msVenus (Src42 DN)</i> | Src42A K276R_f            | GGACAATTGGACGAAGGCGGCTTC                                       |
|                                             | Src42A K276R_r            | CCTAAGCTTGGTGTGGCGCAGTTTC                                      |
|                                             | msVenus_f                 | GAGGCGCGCCGGAAGTTCGGGGTCCAGCGG                                 |
|                                             | msVenus_r                 | CTTACGCGTTTACTTGTACAGCTCGTCCATG                                |
| <i>pattB-Toll-2<sup>WT</sup>-HA</i>         | ZKM019 (attB_bb_f)        | CTTTTCTACGGGTCTGACG                                            |
|                                             | ZKM083 (2_5UTRrevfromORF) | TTGGTGATTTGCTAGTTGG                                            |
|                                             | KSB001 (GA_Toll2_cHA_Fwd) | TACCCATACGATGTTCCAGATTACGCTTAAAACTCCCC<br>TATGGC               |
|                                             | ZKM020 (attB_bb_r)        | CGTCAGACCCCGTAGAAAAG                                           |
|                                             | ZKM096 (Toll-2_attB_GA_f) | GTAACTAGCCAACTAGCAAATCACCAAAATGCCAGCCAC<br>ATCTTCCATCATCACCATC |

|                                                                                                                                  |                            |                                                       |
|----------------------------------------------------------------------------------------------------------------------------------|----------------------------|-------------------------------------------------------|
|                                                                                                                                  | KSB002 (GA_Toll2_cHA_Rev)  | AGCGTAATCTGGAACATCGTATGGGTAGACCAGGAAAGCT<br>TGGCCG    |
| <i>pattB-Toll-2<sup>C2YF</sup>-HA</i><br>and<br><i>pattB-Toll-2<sup>C1,2YF</sup>-HA</i>                                          | ZKM019 (attB_bb_f)         | CTTTTCTACGGGGTCTGACG                                  |
|                                                                                                                                  | SS001 (Toll2_2718R)        | CTGGAGGCTGTGACGATATTG                                 |
|                                                                                                                                  | KSB006 (Toll2-F8)          | GTGGTTTGAGCCAGGCCAG                                   |
|                                                                                                                                  | ZKM020 (attB_bb_r)         | CGTCAGACCCCGTAGAAAAG                                  |
|                                                                                                                                  | SS002 (Toll2_2718F)        | CAATATCGTCACAGCCTCCAG                                 |
|                                                                                                                                  | KSB008 (Toll2-R8)          | CTGGCCTGGCTCAAACCAC                                   |
| <i>pattB-Toll-2<sup>WT</sup>-V5,</i><br><i>pattB-Toll-2<sup>C1YF</sup>-V5,</i><br>and<br><i>pattB-Toll-2<sup>C1,2YF</sup>-V5</i> | ZKM019 (attB_bb_f)         | CTTTTCTACGGGGTCTGACG                                  |
|                                                                                                                                  | KSB005 (Toll2_1036R)       | GTTTTGGATCCAATGCGGGT                                  |
|                                                                                                                                  | KSB009 (GA_cV5_Toll2_Fwd)  | CTCCTCGGTCTCGATTCTACGTAAAACTCCCCCTATGGC<br>CATATC     |
|                                                                                                                                  | KSB010 (GA_attB_bb_R)      | CACTGAGCGTCAGACCCCGTAGAAAAGATCAAAGGATCTT<br>CTTGAGATC |
|                                                                                                                                  | KSB007 (Toll2_1036F)       | ACCCGCATTGGATCCAAAAC                                  |
|                                                                                                                                  | KSB011 (V5_rev)            | CGTAGAATCGAGACCGAGG                                   |
| <i>pattB-Toll-2<sup>WT</sup></i>                                                                                                 | ZKM019 (attB_bb_f)         | CTTTTCTACGGGGTCTGACG                                  |
|                                                                                                                                  | ZKM018 (attBf/r)           | CATCATGATGGACCAGATGG                                  |
|                                                                                                                                  | ZKM020 (attB_bb_r)         | CGTCAGACCCCGTAGAAAAG                                  |
|                                                                                                                                  | ZKM085 (2attB5UTR_new)     | CCATCTGGTCCATCATGATGACGCAACCCACAACCTAC                |
|                                                                                                                                  | ZKM086 (2_attB3UTR_new)    | CCATCTGGTCCATCATGATGGCGAGGCTGAGTGAGATGG               |
| <i>pattB-Toll-2<sup>C2YF</sup></i><br>and<br><i>pattB-Toll-2<sup>C1,2YF</sup></i>                                                | ZKM019 (attB_bb_f)         | CTTTTCTACGGGGTCTGACG                                  |
|                                                                                                                                  | KSB005 (Toll2_1036R)       | GTTTTGGATCCAATGCGGGT                                  |
|                                                                                                                                  | KSB006 (Toll2-F8)          | GTGGTTTGAGCCAGGCCAG                                   |
|                                                                                                                                  | ZKM020 (attB_bb_r)         | CGTCAGACCCCGTAGAAAAG                                  |
|                                                                                                                                  | KSB007 (Toll2_1036F)       | ACCCGCATTGGATCCAAAAC                                  |
|                                                                                                                                  | KSB008 (Toll2-R8)          | CTGGCCTGGCTCAAACCAC                                   |
| <i>Toll-2 dsRNA</i>                                                                                                              | <i>Toll-2 #1 5' primer</i> | TAATACGACTCACTATAGGGAGAAGTTGAATCGAAACGC<br>GAG        |
|                                                                                                                                  | <i>Toll-2 #1 3' primer</i> | TAATACGACTCACTATAGGGAGAGGACACTGCACCGGATG<br>T         |
|                                                                                                                                  |                            |                                                       |

|                       |                            |                                                 |
|-----------------------|----------------------------|-------------------------------------------------|
| <i>Toll-6</i> dsRNA   | <i>Toll-6 #1</i> 5' primer | TAATACGACTCACTATAGGGAGAATCGGCCAAAAGAG<br>CAGTA  |
|                       | <i>Toll-6 #1</i> 3' primer | TAATACGACTCACTATAGGGAGAAGCAGCGTGTGCAGATT<br>ATT |
| <i>Toll-8</i> dsRNA   | <i>Toll-8 #1</i> 5' primer | TAATACGACTCACTATAGGGAGACAGCTGGAGCGTTTGGAA<br>T  |
|                       | <i>Toll-8 #1</i> 3' primer | TAATACGACTCACTATAGGGAGAAGACGCTTGAGACCCAC<br>AAA |
| <i>PI3K-cat</i> dsRNA | <i>PI3K92E</i> 5' primer   | TAATACGACTCACTATAGGGGCATCCGACCAGAACCTTT         |
|                       | <i>PI3K92E</i> 3' primer   | TAATACGACTCACTATAGGGGCACGCGTCTTGTCAAAAGT        |
| <i>Toll-3</i> dsRNA   | <i>Toll-3 #1</i> 5' primer | TAATACGACTCACTATAGGGAGAGAGCCTTGAACATTTGG<br>AGC |
|                       | <i>Toll-3 #1</i> 3' primer | TAATACGACTCACTATAGGGAGACAGTTTCGCTGGAAGGT<br>GAT |
